# Supplementary material for: Discovering the Repeatome of Five Species Belonging to the Asteraceae Family: A Computational Study
Source: MDPI journal article supplement (doi:10.3390/plants12061405), 2023-03-22
Supplement: s1 [file s1]

# Discovering the Repeatome of Five Species Belonging to the Asteraceae Family: A Computational Study

Maria Ventimiglia †, Marco Castellacci †, Gabriele Usai, Alberto Vangelisti, Samuel Simoni, Lucia Natali, Andrea Cavallini, Flavia Mascagni \* and Tommaso Giordani

Department of Agriculture, Food and Environment (DAFE), University of Pisa, Via del Borghetto, 80-56124 Pisa, Italy

\* Correspondence: [flavia.mascagni@unipi.it](mailto:flavia.mascagni@unipi.it)

† These authors contributed equally to this work.

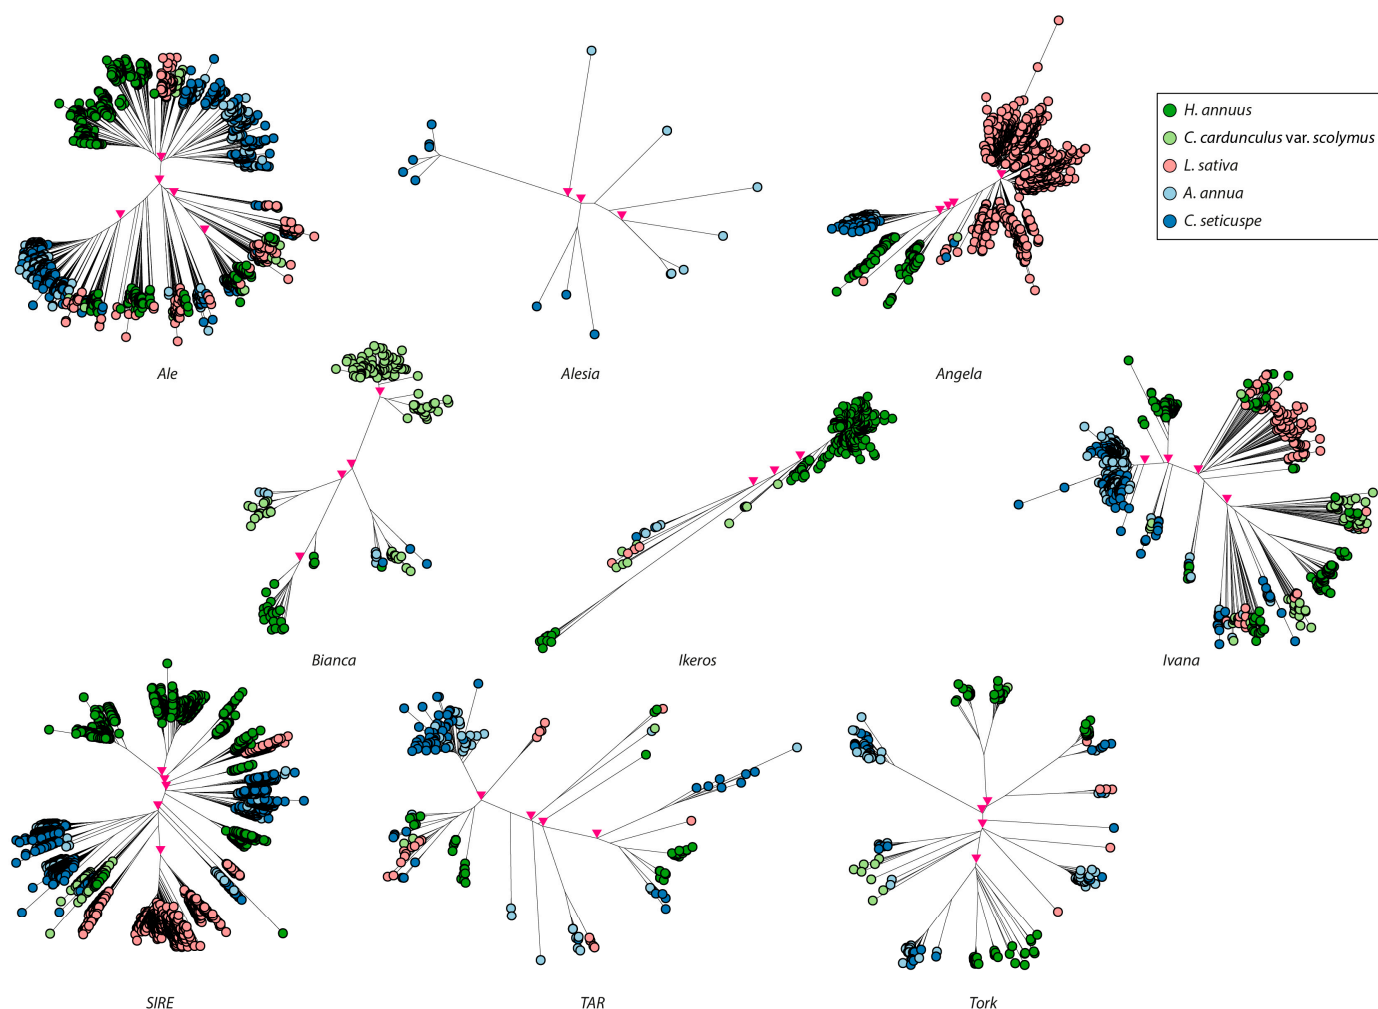

**Figure S1.** Phylogenetic trees of all RT sequences of *Copia* elements retrieved in the five Asteraceae species, separated according to the lineage. The main nodes (bootstrap values > 0.6) are marked with pink triangles. RT = reverse transcriptase.

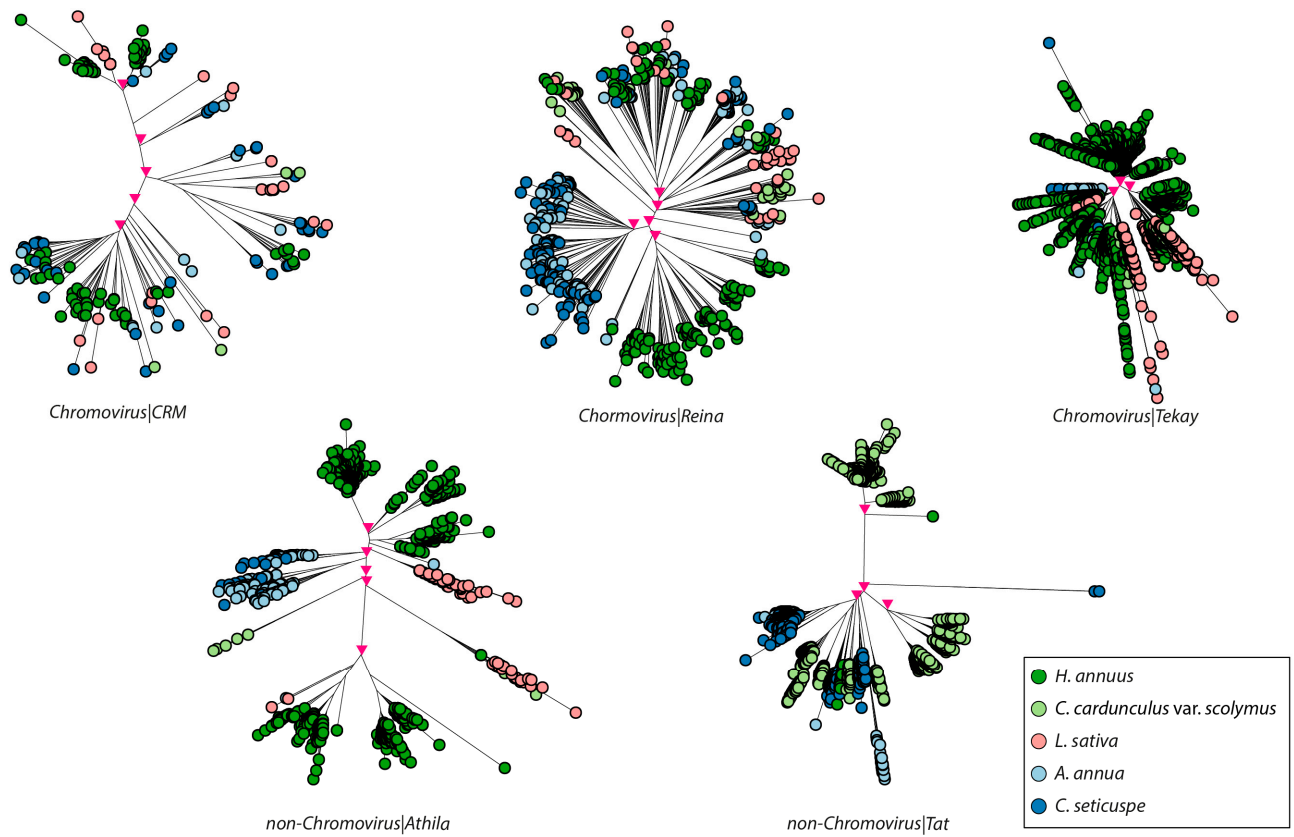

**Figure S2.** Phylogenetic trees of all RT sequences of *Gypsy* elements retrieved in the five Asteraceae species, separated according to the lineage. The main nodes (bootstrap values > 0.6) are marked with pink triangles. RT = reverse transcriptase.
